# Supplementary material for: Transcriptome-wide identification of RNA-binding protein binding sites using seCLIP-seq
Source: Springer Nature journal article supplement (doi:10.1038/s41596-022-00680-z), 2022-03-23
Supplement: MOESM3 [file 41596_2022_680_MOESM3_ESM18.xlsx]

## Sheet: Sheet1
	Experiment type	Experiment ID	purified library (nM)	volume of library (uL)	PCR cycles done	cDNA used for PCR (uL out of 25 uL total)	eCT
Van Nostrand et al. Nature Methods (2016)9	iCLIP	RBFOX2 2BM+H	102.98	20	28	12	23.6357
	peCLIP	RBFOX2 11/20	65.8	10	16	12	13.2819
	peCLIP	RBFOX2 2/4	78.2	10	16	12	13.0328
Van Nostrand et al. Methods Mol Biol (2017)10	peCLIP	OG A IP	25.8	10	12	12	10.6326
	peCLIP	OG B IP	19.1	10	15	12	14.0664
	seCLIP	Inv A IP	17.2	10	14	12	13.2176
	seCLIP	Inv B IP	35.3	10	14	12	12.1803
This publication	seCLIP2	RBFOX2 3IP	19.9	10	8	3	5.00723
	seCLIP2	RBFOX2 4IP	26.3	10	8	12	6.60494
